# Supplementary material for: Endothelial PPARδ facilitates the post-ischemic vascular repair through interaction with HIF1α
Source: PubMed Central journal article supplement (PMC8825601; doi:10.7150/thno.69017), 2022-01-24
Supplement: thnov12p1855s1.pdf [file thnov12p1855s1.pdf]

## Supplementary Figures

### Supplementary Figure 1

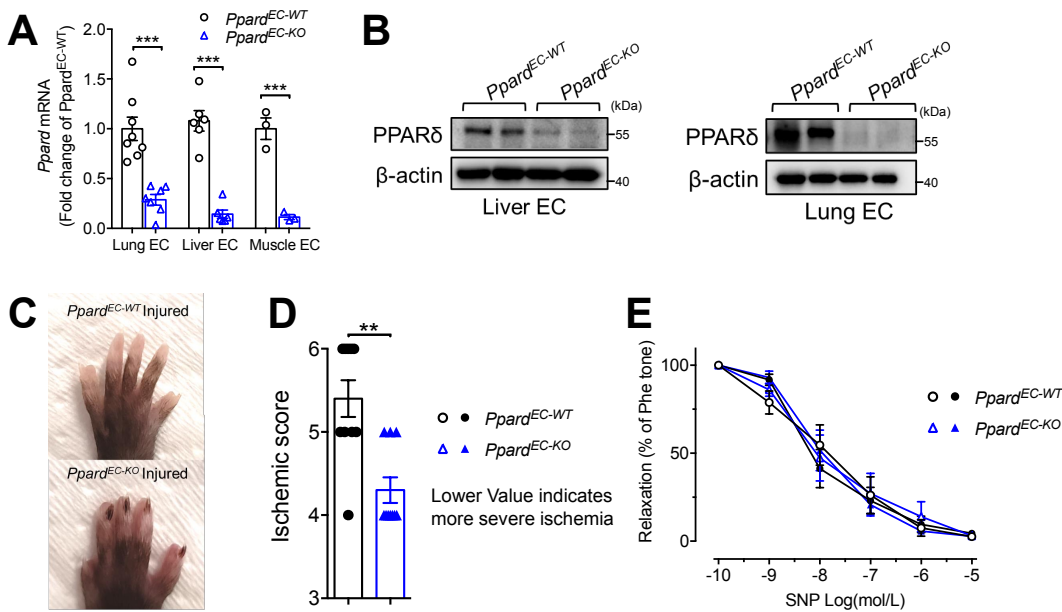

**Figure S1.** PPAR $\delta$  expression Endothelial cells were isolated from lung, liver and skeletal muscle measured at mRNA level by qRT-PCR (A) (n = 8 for lung group, n = 6 for liver group, n = 3 for skeletal muscle group) and at protein level by Western blotting (B). C, Representative pictures of the foot color and nails at days 7 after HLI. D, Ischemic score as described (n = 10, each group). E, Concentration-response curves to SNP in femoral arteries at days 28 after HLI (n = 6, each group). Results are means  $\pm$  SEM. Student's t test was used for comparison between two samples, and one-way ANOVA and multiple comparison test was used for more than two samples. \* p < 0.05, \*\* p < 0.01, \*\*\* p < 0.001 between groups.

### Supplementary Figure 2

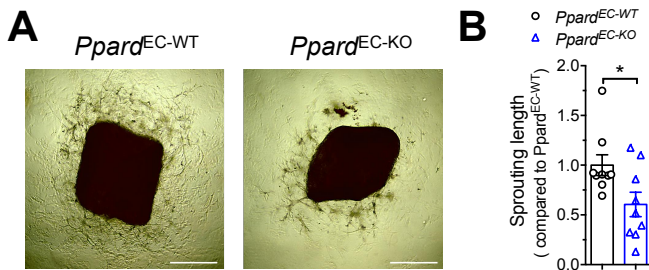

**Figure S2.** A (representative images) and B (summarized analysis) of sprouting length from mouse aortic ring in *Ppard*<sup>EC-KO</sup> mice compared to *Ppard*<sup>EC-WT</sup> (n = 9, each group). Scale bar: 200  $\mu$ m. Student's t test was used for comparison between two samples, and one-way ANOVA and multiple comparison test was used for more than two samples. \* p < 0.05, \*\* p < 0.01, \*\*\* p < 0.001 between groups.

### Supplementary Figure 3

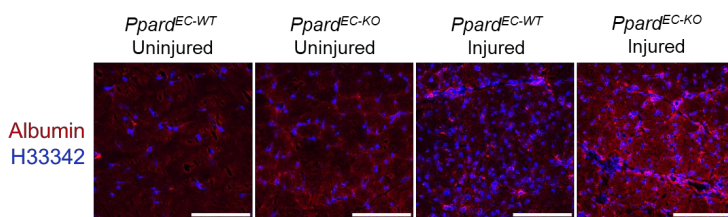

**Figure S3.** Representative images of immunostaining of albumin (red) in frozen sections of GA muscle 14 days after HLI (n = 6, each group). Scale bar: 200  $\mu$ m.

# Supplementary Figure 4

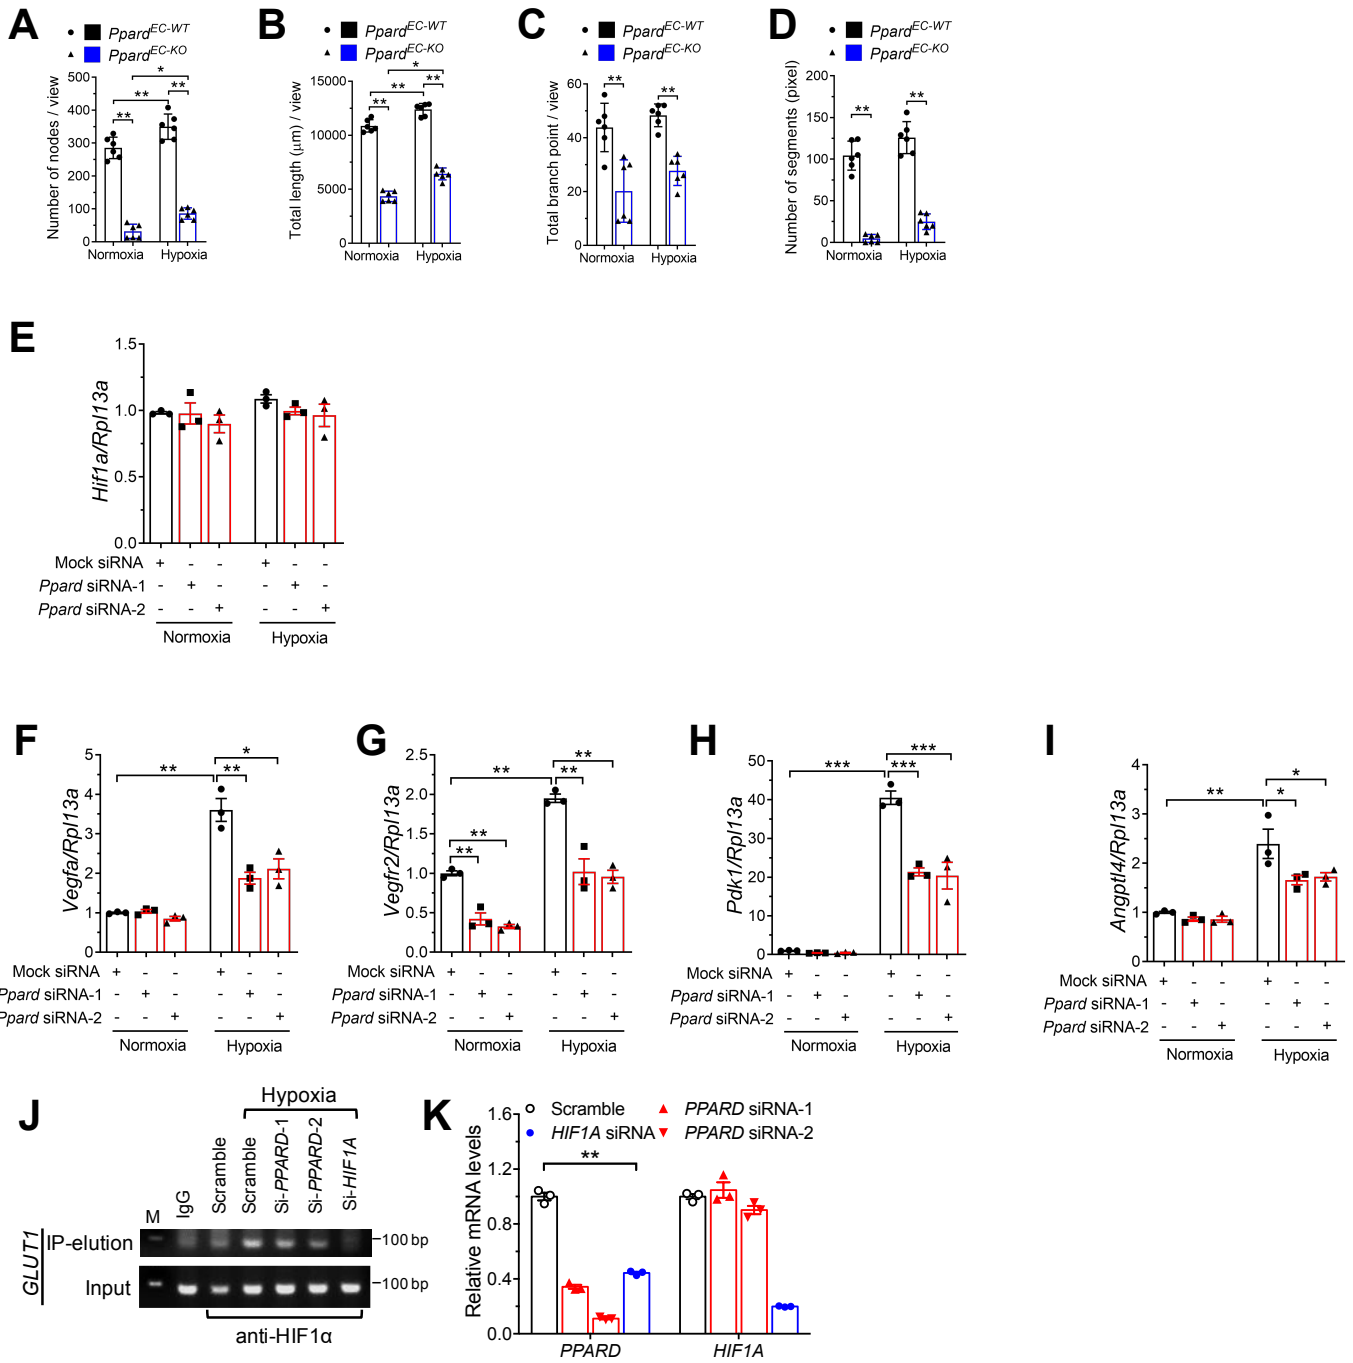

**Figure S4.** A-D, summarized analysis of tube formation in **Figure 5A** analyzed using the Angiogenesis Analyzer of Image J (n = 6, each group). E-I, qPCR analysis of *Hif1a*, *Vegfa*, *Vegfr2*, *Pdk1*, and *Angptl4* mRNA levels in mBMECs under hypoxia for 12 h after transfection with siRNA, from 3 biological replicates. J, Representative gel showing ChIP of anti-HIF1α immunoprecipitates from HeLa cells after *HIF1A* or *PPARD* silencing, followed by hypoxia for 12 h to show HIF1α enrichment on the *GLUT1* promoter. K, mRNA expression of HIF1α or PPARδ under hypoxia for 12 h, in HeLa cells. Results are means ± SEM. \* p < 0.05, \*\* p < 0.01 between groups by one-way ANOVA and multiple comparison test.

## Supplementary Figure 5

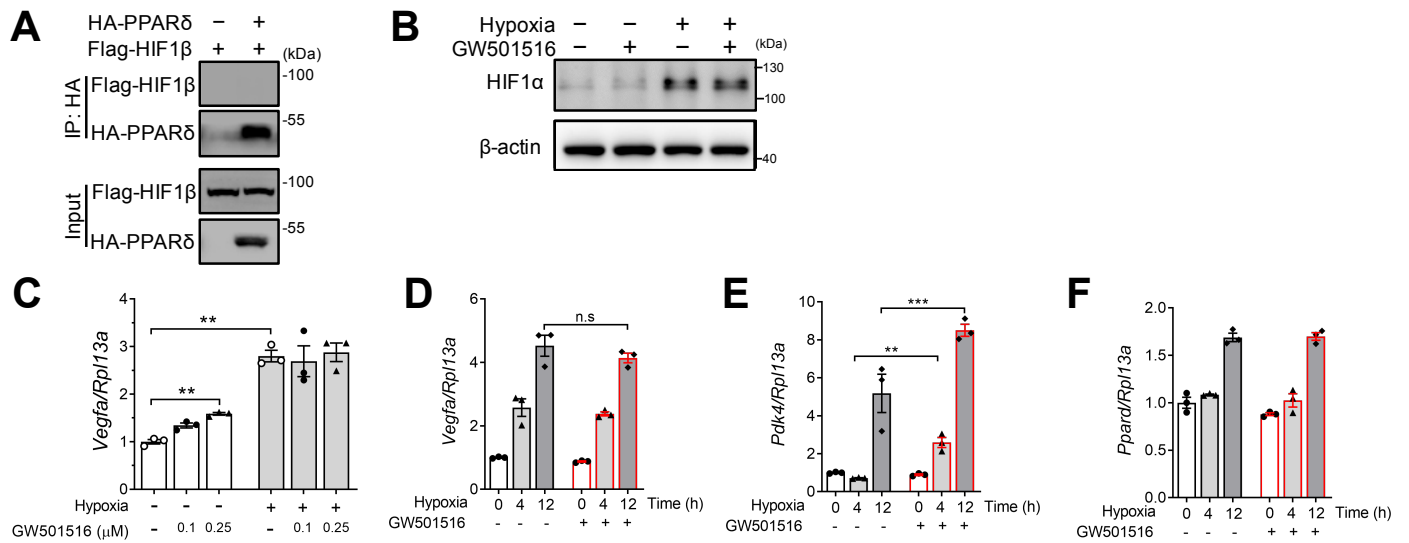

**Figure S5.** **A**, Immunoblots showing the anti-HA immunoprecipitates in HEK293T cells with indicated plasmids transfected, indicating the no interaction of PPAR $\delta$  and HIF1 $\beta$  in HEK293T cells. **B**, Immunoblots showing HIF1 $\alpha$  under indicated conditions in BMECs (Hypoxia: 12 hours) with or without GW501516 (100 nmol/L). Results are representative data with at least three replicates. **C-F**, qPCR analysis of *Vegfa*, *Pdk4*, and *Ppard* in mBMECs under hypoxia for 12 h after treated with GW501516 at the indicated concentration and duration. Results are biological replicates expressed in means  $\pm$  SEM. \*  $p < 0.05$ , \*\*  $p < 0.01$  between groups by one-way ANOVA and multiple comparison test.

## Supplementary Figure 6

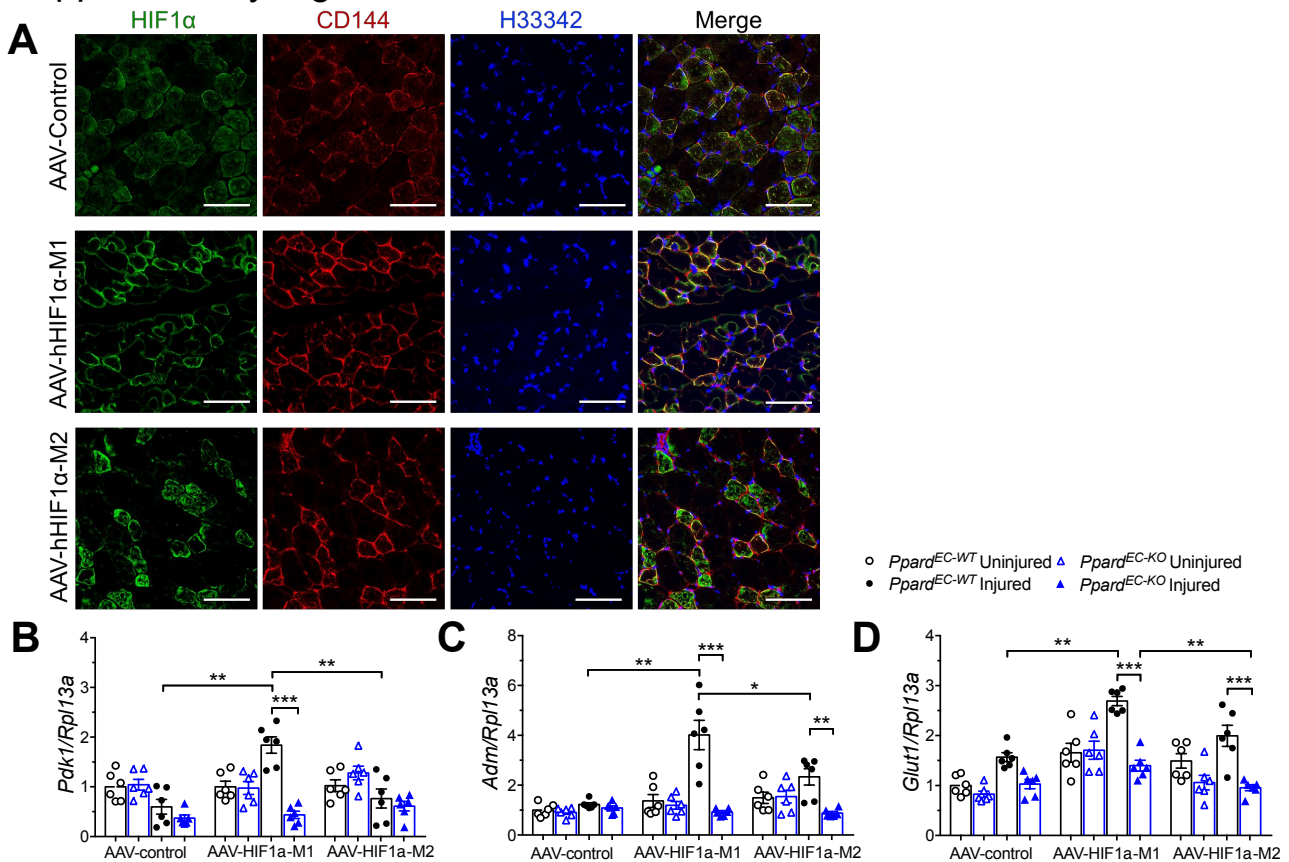

**Figure S6.** **A**, Representative images of immunofluorescence of HIF1 $\alpha$  (green) expression to co-localized with CD144 (red) in muscle at day 7 after HLI (n = 3, each group). Scale bar: 200  $\mu$ m. **B-D**, qPCR analysis for HIF1 $\alpha$  downstream gene mRNA expression in muscles collected 7 days after HLI (n = 6, each group). Results are means  $\pm$  SEM. \*  $p < 0.05$ , \*\*  $p < 0.01$ , between groups by one-way ANOVA and multiple comparison test.

**Table S1: List of primers**

| Genes                                | Primer sequence (5' to 3')                         |
|--------------------------------------|----------------------------------------------------|
| Mouse <i>18sRNA</i>                  | GCAATTATTCCCATGAACG<br>GGCCTCACTAAACCATCCAA        |
| Mouse <i>Gapdh</i>                   | ATGGTGAAGGTCGGTGTGAA<br>GAGGTCAATGAAGGGGTCGT       |
| Mouse <i>Pax3</i>                    | GCGTCTCTAAGATCCTGTGCAG<br>GATTTCCAGCTAAACATGCCCG   |
| Mouse <i>Pax7</i>                    | GTTCGGGAAGAAAGAGGACGAC<br>GGTTCTGATTCCACATCTGAGCC  |
| Mouse <i>Myf5</i>                    | GGTGGAGAACTATTACAGCCTGC<br>ACAGTAGATGCTGTCAAAGCTGC |
| Mouse <i>MyoD</i>                    | GCACTACAGTGGCGACTCAGAT<br>TAGTAGGCGGTGTCGTAGCCAT   |
| Mouse <i>Myogenin</i>                | CCATCCAGTACATTGAGCGCCT<br>CTGTGGGAGTTGCATTCCTGG    |
| Mouse $\alpha$ -SMA ( <i>Acta2</i> ) | TGCTGACAGAGGCACCACTGAA<br>CAGTTGTACGTCCAGAGGCATAG  |
| Mouse <i>CD31(Pecam1)</i>            | AGTCAGAGTCTTCCTTGCCC<br>CTCCACGGGTTTCTGTTTGG       |
| Mouse <i>Cxcl12</i>                  | GCCAACGTCAAGCATCTGAA<br>TTCGGGTCAATGCACACTTG       |
| Mouse <i>Aqp1</i>                    | CTTGCCATTGGCTTGTCTGTGG<br>CCAGTGGTTTGAGAAGTTGCGG   |
| Mouse <i>Klf2</i>                    | CACCTAAAGGCGCATCTGCGTA<br>GTGACCTGTGTGCTTTCGGTAG   |
| Mouse <i>Fabp4</i>                   | AAGGTGAAGAGCATCATAACCCT<br>TCACGCCTTTCATAACACATTCC |
| Mouse <i>Egfr</i>                    | CTGAGCATGTCTACAGACCCAG<br>TCTGTGTCCGTCGCAAGTGGTG   |
| Mouse <i>Afn</i>                     | TGCCAGCCTTTCTGGATGATCC<br>CTGGATGGTCAAGGCAGCATTG   |
| Mouse <i>Jam-2</i>                   | CAGACTGGAGTGAAGAAGGTG<br>GCTGACTTCACAGCGATACTCTC   |
| Mouse <i>Jam-3</i>                   | GCATTGCTTCCAATGACGCAGG<br>GATGAAGCAGCCTCGTCTGTAC   |
| Mouse <i>Nectin-2</i>                | GCCATACTGACCTGTGATGTACG<br>TCCACAGAGTGGACAAGCAGCT  |
| Mouse <i>Gja5</i>                    | GTGCCAAACCAGGAGCAGATTC<br>CGCCGTTTGTCACTATGGTAGC   |
| Mouse <i>Tie2</i>                    | GAAGTGAAGGACGCTTCCACATTC<br>TCAGAAACGCCAACAGCACGGT |
| Mouse <i>Vegfa</i>                   | GCTGTAACGATGAAGCCCTG<br>CCTATGTGCTGGCTTTGGTG       |
| Mouse <i>Apelin</i>                  | ATGAATCTGAGGCTCTGCGT<br>GTCCTCGAAGTTCTGGGCTT       |
| Mouse <i>Vegfr2</i>                  | TTTGGCAAATACAACCCTTCAGA<br>GCAGAAGATACTGTCACCACC   |
| Mouse <i>Angiop-1</i>                | AGGCTTGGTTTCTCGTCAGA<br>TGCCATGAGCTCCAGTTGT        |
| Mouse <i>IL-8</i>                    | GGTATATTCGAGACCATTTACTG<br>GCCAACAGTAGCCTTCACCCAT  |
| Mouse <i>Fgf2</i>                    | AAGCGGCTCTACTGCAAGAACG                             |

|                                            |                                                                                                    |
|--------------------------------------------|----------------------------------------------------------------------------------------------------|
|                                            | CCTTGATAGACACAACCTCCTCTC                                                                           |
| Mouse <i>Hgf</i>                           | GCAGTACCCTCACAAAGCATG<br>ACTCGGATGTTTGGGTCAGT                                                      |
| Mouse <i>Cldn5</i>                         | GCAAGGTGTATGAATCTGTGCT<br>GTCAAGGTAACAAAGAGTGCCA                                                   |
| Mouse <i>Zo-1</i>                          | GTTGGTACGGTGCCCTGAAAGA<br>GCTGACAGGTAGGACAGACGAT                                                   |
| Mouse <i>Occludin-1</i>                    | TGGCAAGCGATCATACCCAGAG<br>CTGCCTGAAGTCATCCACACTC                                                   |
| Mouse <i>Nectin-1</i>                      | AGCGGACAGATGTGAAGCTCAC<br>TTCTGCCAGGCTGTAGGTGAT                                                    |
| Mouse <i>Icam1</i>                         | AAACCAGACCCTGGAAGTGCAC<br>GCCTGGCATTTCAGAGTCTGCT                                                   |
| Mouse <i>Vcam1</i>                         | ACAGACAGTCCCCTCAATGG<br>TCCTCAAACCCACAGAGCT                                                        |
| Mouse <i>E-selectin</i>                    | AGTTGTGAGTTCTCCTGCGA<br>CACTCCATGACGCCATTCTG                                                       |
| Mouse <i>Ccl2</i>                          | CATCCACGTGTTGGCTCA<br>GATCATCTTGCTGGTGAATGAGT                                                      |
| Mouse <i>Ccr2</i>                          | ACCAGAAGAGGGCATTGGAT<br>GCCGTGGATGAACTGAGGTA                                                       |
| Mouse <i>Cx3cl1</i>                        | GTGCGACAAGATGACCTCAC<br>GCGTCTTGGACCCATTTCTC                                                       |
| Mouse <i>IL-1<math>\beta</math></i>        | GAAATGCCACCTTTTGACAGTG<br>TGGATGCTCTCATCAGGACAG                                                    |
| Mouse <i>IL-6</i>                          | TCTATACCACTTCACAAGTCGGA<br>GAATTGCCATTGCACAACTCTTT                                                 |
| Mouse <i>IFN<math>\gamma</math> (IFNG)</i> | CAGCAACAGCAAGGCGAAAAAGG<br>TTTCCGCTTCCTGAGGCTGGAT                                                  |
| Mouse <i>Hif1<math>\alpha</math></i>       | ACTTTTGGGCCGCTCAATTT<br>ACTTTTGGGCCGCTCAATTT                                                       |
| Mouse <i>Glut1</i>                         | GCTTCTCCAAGTGGACCTCAAAC<br>ACGAGGAGCACCGTGAAGATGA                                                  |
| Mouse <i>Angptl4</i>                       | CTGGACAGTGATTCAGAGACGC<br>GATGCTGTGCATCTTTTCCAGGC                                                  |
| Mouse <i>Rpl13a</i>                        | AGTATCTGGCCTTTCTCCGG<br>CCGAACAACCTTGAGAGCAG                                                       |
| Mouse <i>Pdk1</i>                          | CTGAGCATGTCTACAGACCCAG<br>TCTGTGTCCGTGCAAGTGGTG                                                    |
| Mouse <i>Ppard</i>                         | AGGAGAAAGAGGAAGTGGCC<br>GGGAGGAATTCTGGGAGAGG                                                       |
| Mouse <i>Adm</i>                           | GCCAGATACTCCTTCGCAGTTC<br>AGGAACTGTCGTCTCATCAGCG                                                   |
| Human <i>Hif1<math>\alpha</math></i>       | GCCACATCATCACCATATAGAG<br>GACTCAAAGCGACAGATAACAC                                                   |
| Human <i>Ppard</i>                         | GGCTTCCAAGTACGGTGTTCATG<br>CTGGCACTTGTGCGGTTCTTC                                                   |
| Human <i>Glut1</i><br>(For ChIP)           | TAGCAACAGCGAGCGTGCCG<br>CCCCGTCGTTTGGTCTCCT                                                        |
| <i>PPAR<math>\delta</math>-DBD</i>         | ATTCATCGATAGATCTGATGGAGCAGCCACAGGAGGAAGC<br>CC<br>ATGCCACCCGGGATCCTTACAGCCCTGCCACCAGCTTCTC<br>CTTC |

|                    |                                                                                                   |
|--------------------|---------------------------------------------------------------------------------------------------|
| PPAR $\delta$ -LBD | ATTCATCGATAGATCTGCAGGTGGCCGACCTGAAGGCCTTC<br>TC<br>ATGCCACCCGGGATCCTTAGTACATGTCCTTGTAGATCTCC<br>T |
|--------------------|---------------------------------------------------------------------------------------------------|

**Table S2: List of antibodies**

| Target antigen                                                                       | Source                      | Catalog    | Working concentration |
|--------------------------------------------------------------------------------------|-----------------------------|------------|-----------------------|
| Anti-alpha smooth muscle Actin                                                       | Abcam                       | ab32575    | 1:500                 |
| AF647 Rat Anti-Mouse CD144                                                           | BD biosciences              | 562242     | 1:100                 |
| Alexa Fluor® 488 anti-mouse CD31                                                     | MEC13.3                     | Biologend  | 1:200                 |
| PE-Cy <sup>TM</sup> 7 Rat Anti-CD11b                                                 | BD biosciences              | 552850     | 1:100                 |
| Anti-Albumin                                                                         | Abcam                       | ab207327   | 1:500                 |
| CD144 (VE-cadherin) Monoclonal Antibody                                              | Invitrogen                  | 14-1441-82 | 1:500                 |
| Brilliant Violet 605 <sup>TM</sup> anti-mouse CD45 Antibody                          | Biologend                   | 103140     | 1:200                 |
| BV605 Rat Anti-Mouse CD144                                                           | BD Biosciences              | 748261     | 1:100                 |
| PE/Cy7 anti-mouse F4/80                                                              | Biologend                   | 123114     | 1:100                 |
| Anti-CD68 antibody                                                                   | Abcam                       | ab31630    | 1:250                 |
| PerCP/Cy5.5 anti-mouse Ly-6C Antibody                                                | Biologend                   | 128012     | 1:100                 |
| VEGFR1 antibody                                                                      | Affbiotech                  | AF6204     | 1:250                 |
| CD81 antibody-internal                                                               | Affbiotech                  | DF2306     | 1:250                 |
| CD63 antibody-internal                                                               | Affbiotech                  | DF2305     | 1:250                 |
| Claudin 5 antibody-C-terminal                                                        | Affbiotech                  | AF5216     | 1:250                 |
| HIF1A antibody                                                                       | Affbiotech                  | BF0593     | 1:500                 |
| LIVE/DEAD <sup>TM</sup> Fixable Aqua Dead Cell Stain Kit                             | Invitrogen <sup>TM</sup>    | L34966     | 1:500                 |
| Goat anti-Rabbit IgG (H+L) Highly Cross-Adsorbed Secondary Antibody, Alexa Fluor 488 | Invitrogen                  | A-11034    | 1:500                 |
| Anti-PPAR delta antibody (ab23673)                                                   | Abcam                       | ab23673    | 1:1000                |
| Goat Anti-Rabbit IgG (H + L)-HRP Conjugate                                           | Bio-rad                     | 1706515    | 1:2000                |
| Goat Anti-Mouse IgG (H + L)-HRP Conjugate                                            | Bio-rad                     | 1706516    | 1:2000                |
| Brilliant Violet 605 <sup>TM</sup> anti-mouse CD64 (Fc $\gamma$ RI) Antibody         | Biologend                   | 139323     | 1:100                 |
| Alexa Fluor® 647 anti-mouse/human Ki-67 Antibody                                     | Biologend                   | 151206     | 1:100                 |
| PE anti-mouse CD106 Antibody                                                         | Biologend                   | 105713     | 1:100                 |
| mouse anti-beta-actin loading control antibody                                       | Thermofisher                | MA5-15739  | 1:1000                |
| mouse anti-GAPDH loading control antibody                                            | Thermofisher                | MA5-15738  | 1:1000                |
| PE anti-mouse Ly-6G Antibody                                                         | Biologend                   | 127608     | 1:100                 |
| AF488 anti-mouse CD4 antibody                                                        | Biologend                   | 100529     | 1:100                 |
| Recombinant Anti-VCAM1 antibody                                                      | Abcam                       | ab134047   | 1:250                 |
| Purified Rat Anti-Mouse CD16/CD32 (Mouse BD Fc Block <sup>TM</sup> )                 | BD Pharmingen <sup>TM</sup> | 553142     | 1:1000                |
| ZO-1 Monoclonal Antibody (ZO1-1A12)                                                  | Invitrogen                  | 33-9100    | 1:100                 |

|                                                                                                 |            |           |       |
|-------------------------------------------------------------------------------------------------|------------|-----------|-------|
| HIF-1 $\alpha$ (D1S7W) XP <sup>®</sup> Rabbit<br>mAb #36169                                     | CST        | 36169S    | 1:100 |
| Goat anti-Mouse IgG (H+L) Highly Cross-<br>Adsorbed Secondary Antibody, Alexa Fluor<br>Plus 488 | Invitrogen | A32723    | 1:500 |
| Goat anti-Rat IgG (H+L) Cross-Adsorbed<br>Secondary Antibody, Alexa Fluor 568                   | Invitrogen | A-11077   | 1:500 |
| PE/Cy7 anti-mouse CD133 Antibody                                                                | Biolegend  | 315-2C11  | 1:100 |
| Mouse VEGFR2/KDR/Flk-1 Antibody                                                                 | R&D        | Af644     | 1:100 |
| Anti-CD31 antibody                                                                              | Abcam      | ab28364   | 1:500 |
| Fluorescein labeled Griffonia (Bandeiraea)<br>Simplicifolia Lectin I (GSL I, BSL I)             | Vectorlabs | FL-1101-5 |       |
